# Supplementary material
Source: publisher figshare collection journal article supplement (https://aacr.figshare.com/articles/dataset/_/22432533)
Supplement: Supplementary file 1 [file 39878922]

Supplementary Figure S9

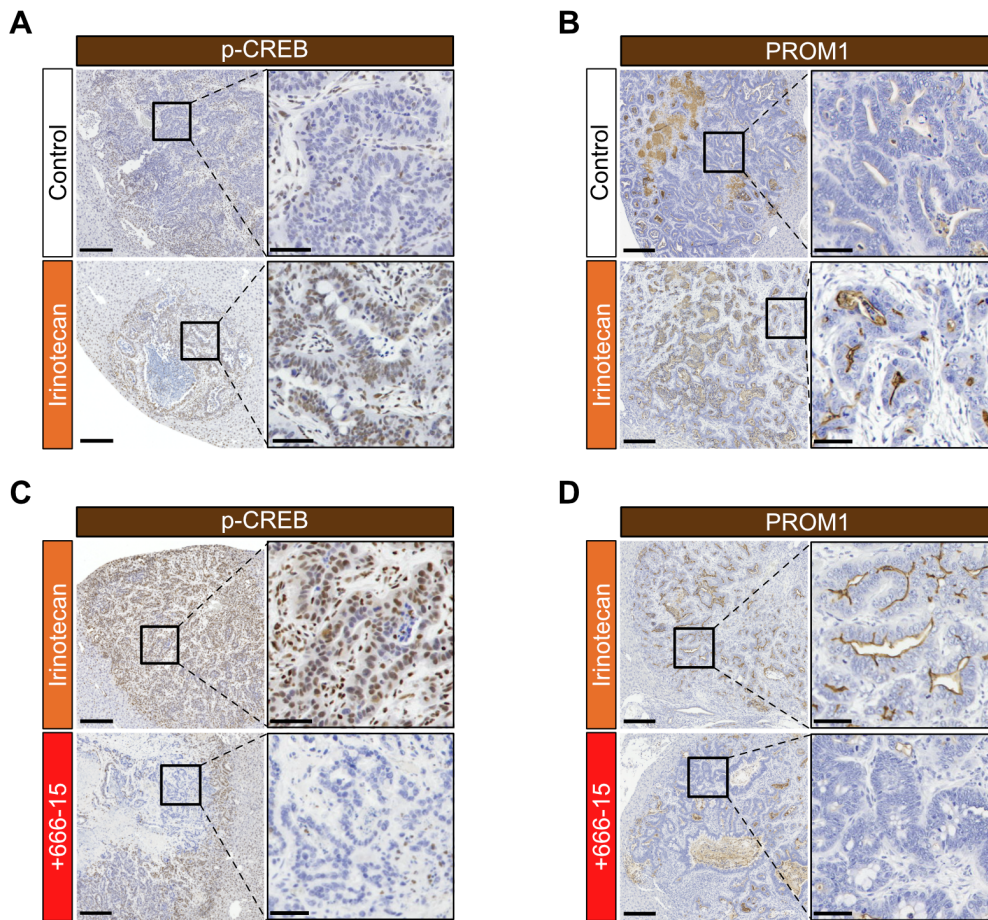

**Supplementary Figure S9. Effect of treatment with irinotecan alone or irinotecan plus 666-15 on CREB phosphorylation and PROM1 expression in the liver metastases of CKPS cells.** (A) and (B) Immunostaining of p-CREB (A) and PROM1 (B) in representative liver metastases in mice induced with CKPS cells and treated or not with irinotecan. See Fig. 6C for treatment schedule. Scale bars: 200  $\mu\text{m}$  for left panels and 50  $\mu\text{m}$  for right panels. (C) and (D) Immunostaining of p-CREB (C) and PROM1 (D) in representative liver metastases in mice induced with CKPS cells and treated with irinotecan alone or irinotecan plus 666-15. See Fig. 6E for treatment schedule. Scale bars: 200  $\mu\text{m}$  for left panels and 50  $\mu\text{m}$  for right panels.
